# Supplementary figures and images for: Sensitivity to image recurrence across eye-movement-like image transitions through local serial inhibition in the retina
Source: eLife journal article supplement (doi:10.7554/elife.22431), 2017-02-23

Figure 8 - figure supplement 2

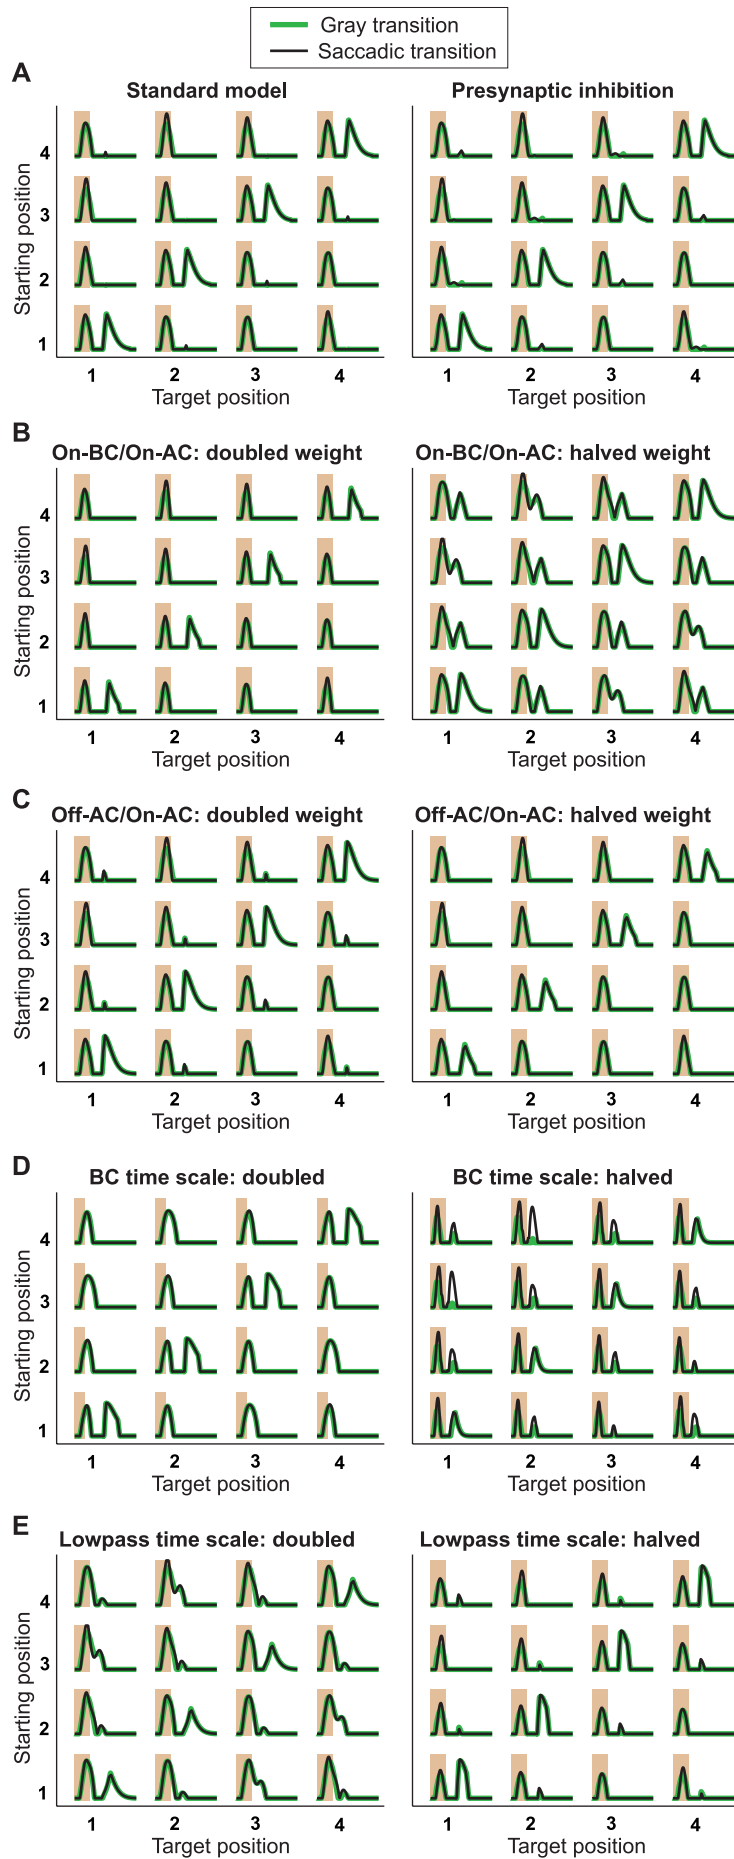

Supplement: supp [file elife-22431-supp-v1.zip]

Figure 3 - figure supplement 1

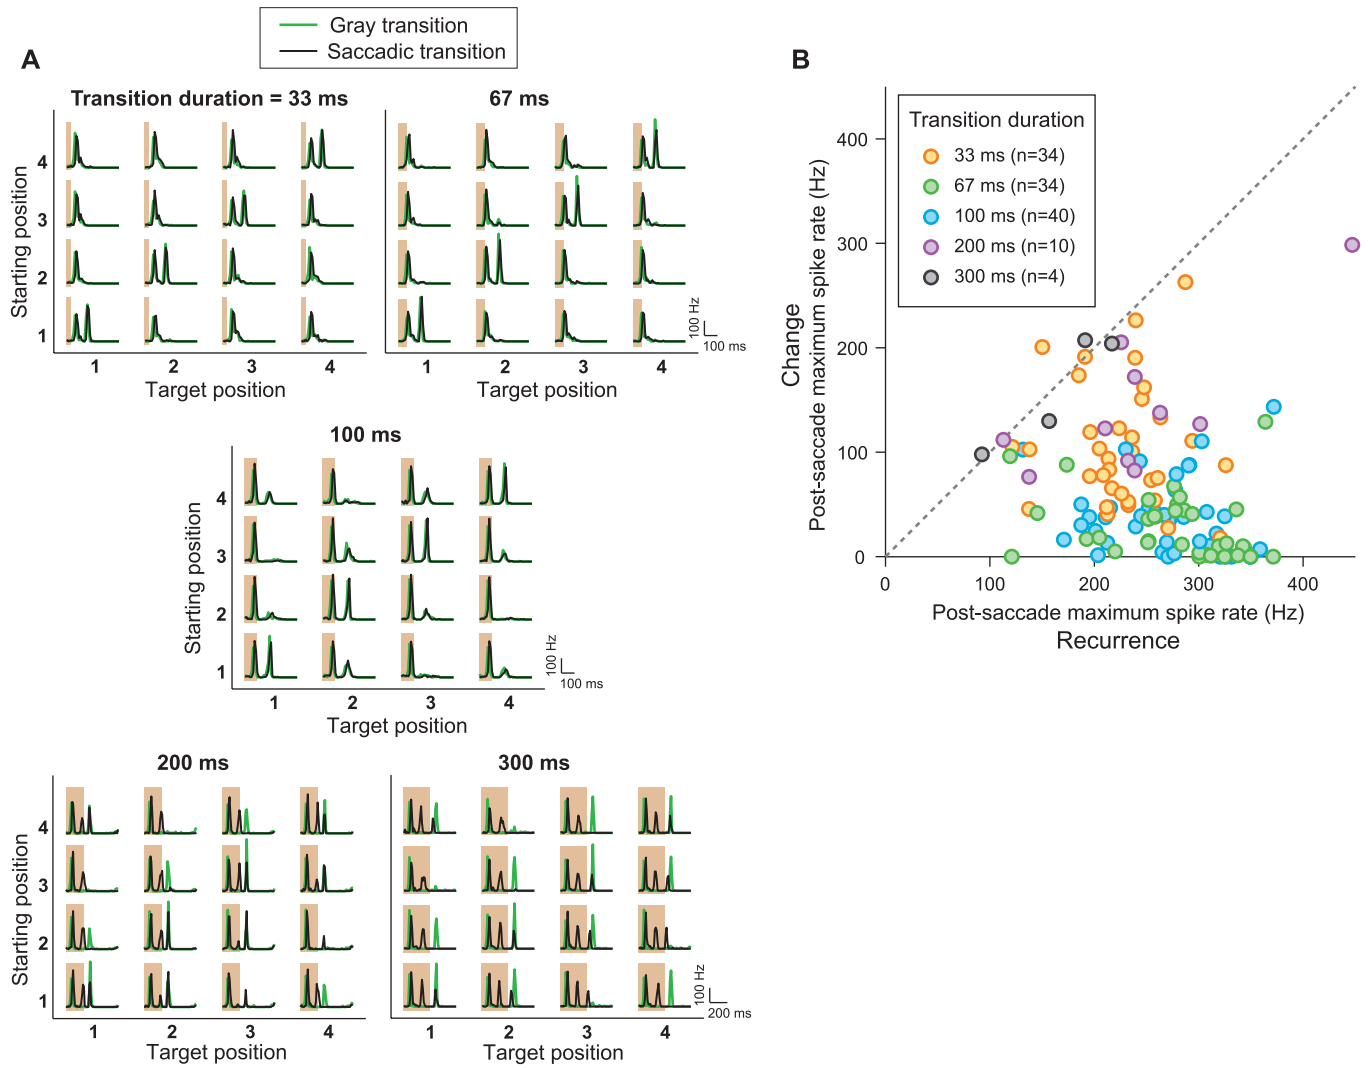

Supplement: supp [file elife-22431-supp-v1.zip]

Figure 4 - figure supplement 1

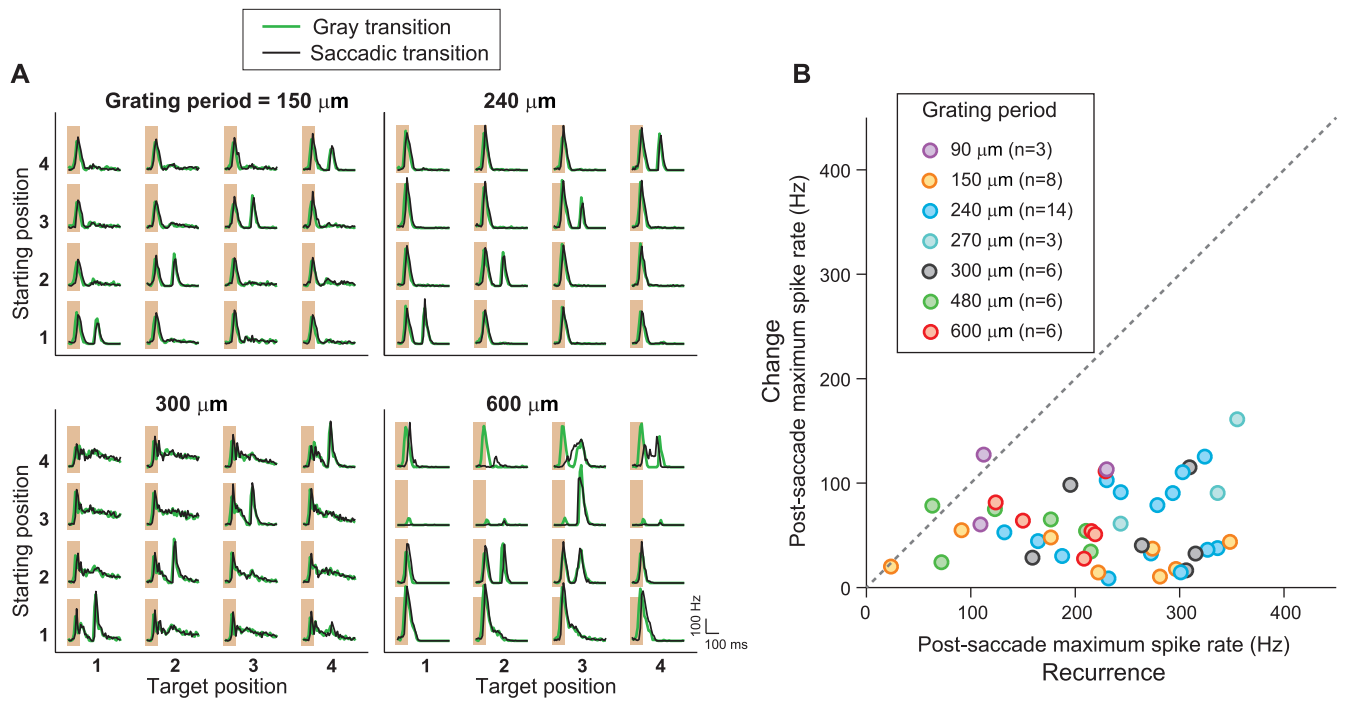

Supplement: supp [file elife-22431-supp-v1.zip]

Figure 8 - figure supplement 1

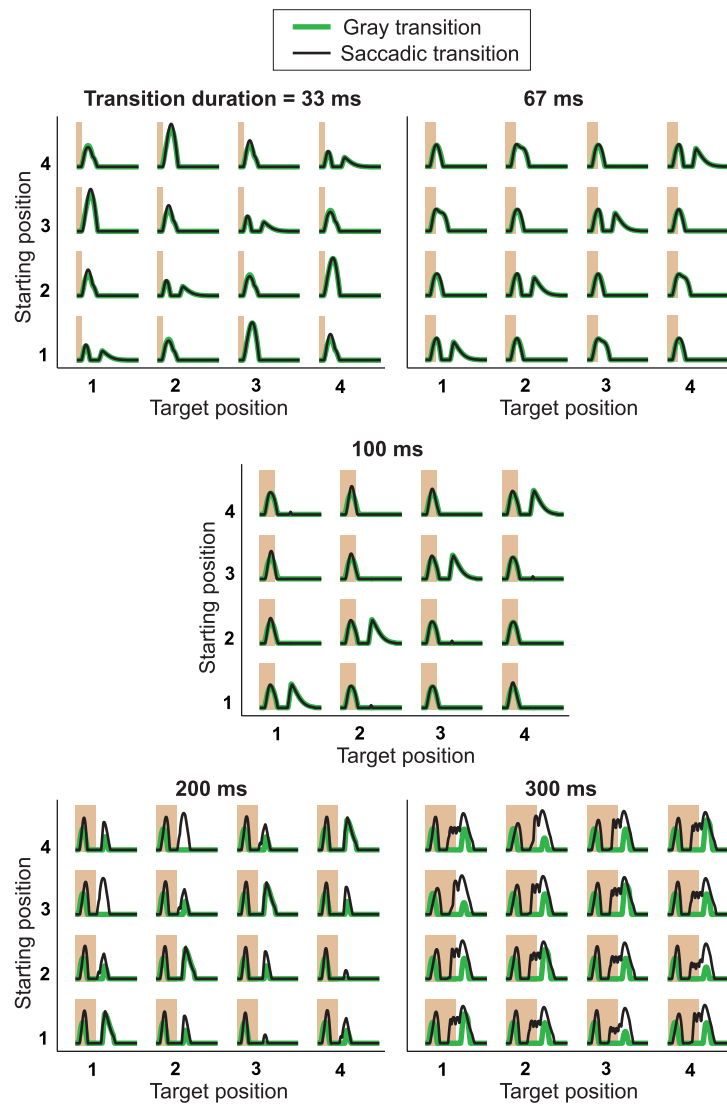

Supplement: supp [file elife-22431-supp-v1.zip]
